# Supplementary material
Source: PubMed Central journal article supplement (PMC2923076)

## Figure legends

Fig. 1. Variation by year (2002-04) in P-G genotype frequencies (with exact 95% CI) determined for 558 rotavirus positive samples from Kilifi District Hospital, Kenya 2002-04. Low frequency types include all single strain genotypes with a frequency over the 3 years of less than 15 cases.

Fig. 2. Seasonal variation in P-G genotypes determined for 558 group A rotavirus (GARV) positive samples from Kilifi District Hospital, Kenya 2002-04. The top left panel details totals for all variants by year and quarter (bars) and total cases of diarrhea (lines) from which GARV positives identified.

Fig. S1. Distribution of genotype frequencies by monthly for years 2002 (a), 2003 (b) and 2004 (c) for 558 rotavirus positive cases admitted to Kilifi District Hospital. Monthly totals are shown with labels on the X axis.

Table S1. Rotavirus PAGE types from 558 pediatric diarrhea cases admitted to Kilifi District Hospital, Kenya 2002-04.

| PAGE  | 2002 | 2003 | 2004 | Total |
|-------|------|------|------|-------|
| L1    | 121  | 70   | 111  | 302   |
| L2    | 6    | 45   | 2    | 53    |
| L3    | 5    | 7    | 9    | 21    |
| L4    | 0    | 0    | 9    | 9     |
| L5    | 0    | 0    | 2    | 2     |
| L6    | 0    | 0    | 1    | 1     |
| L?    | 0    | 0    | 1    | 1     |
| Lmix  | 0    | 1    | 0    | 1     |
| S1    | 9    | 3    | 5    | 17    |
| S2    | 12   | 5    | 5    | 22    |
| S3    | 4    | 4    | 30   | 38    |
| S4    | 1    | 3    | 5    | 9     |
| neg   | 20   | 31   | 31   | 82    |
| Total | 178  | 169  | 211  | 558   |

Notes.

L? Unknown long type

Lmix Mixed long type

Fig. S1a 2002 Genotype distribution

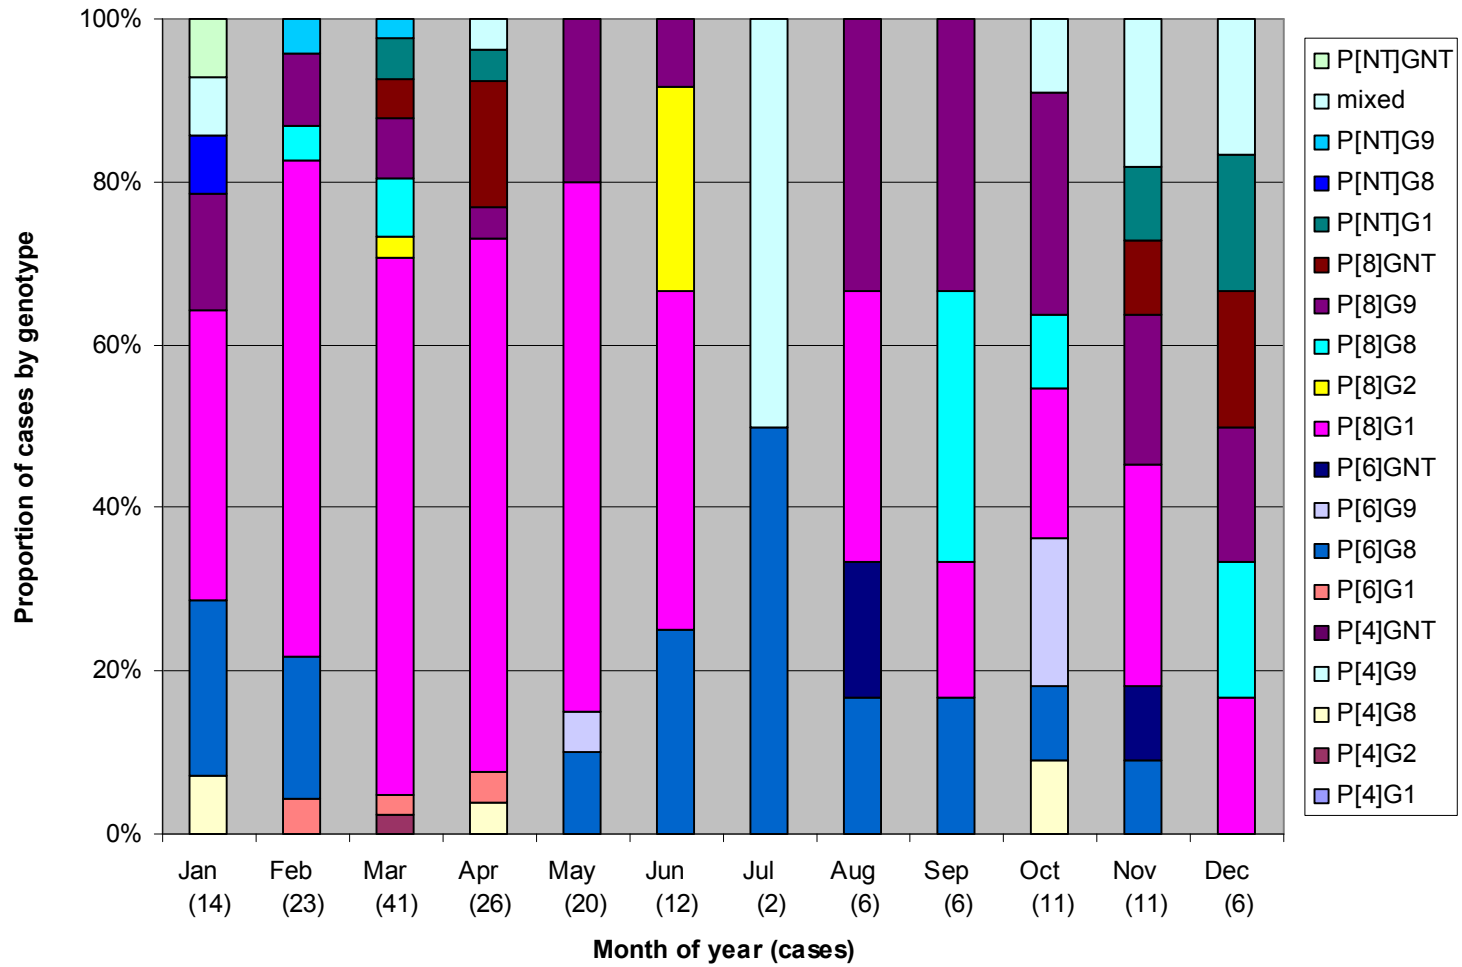

Fig. S1b 2003 Genotype distribution

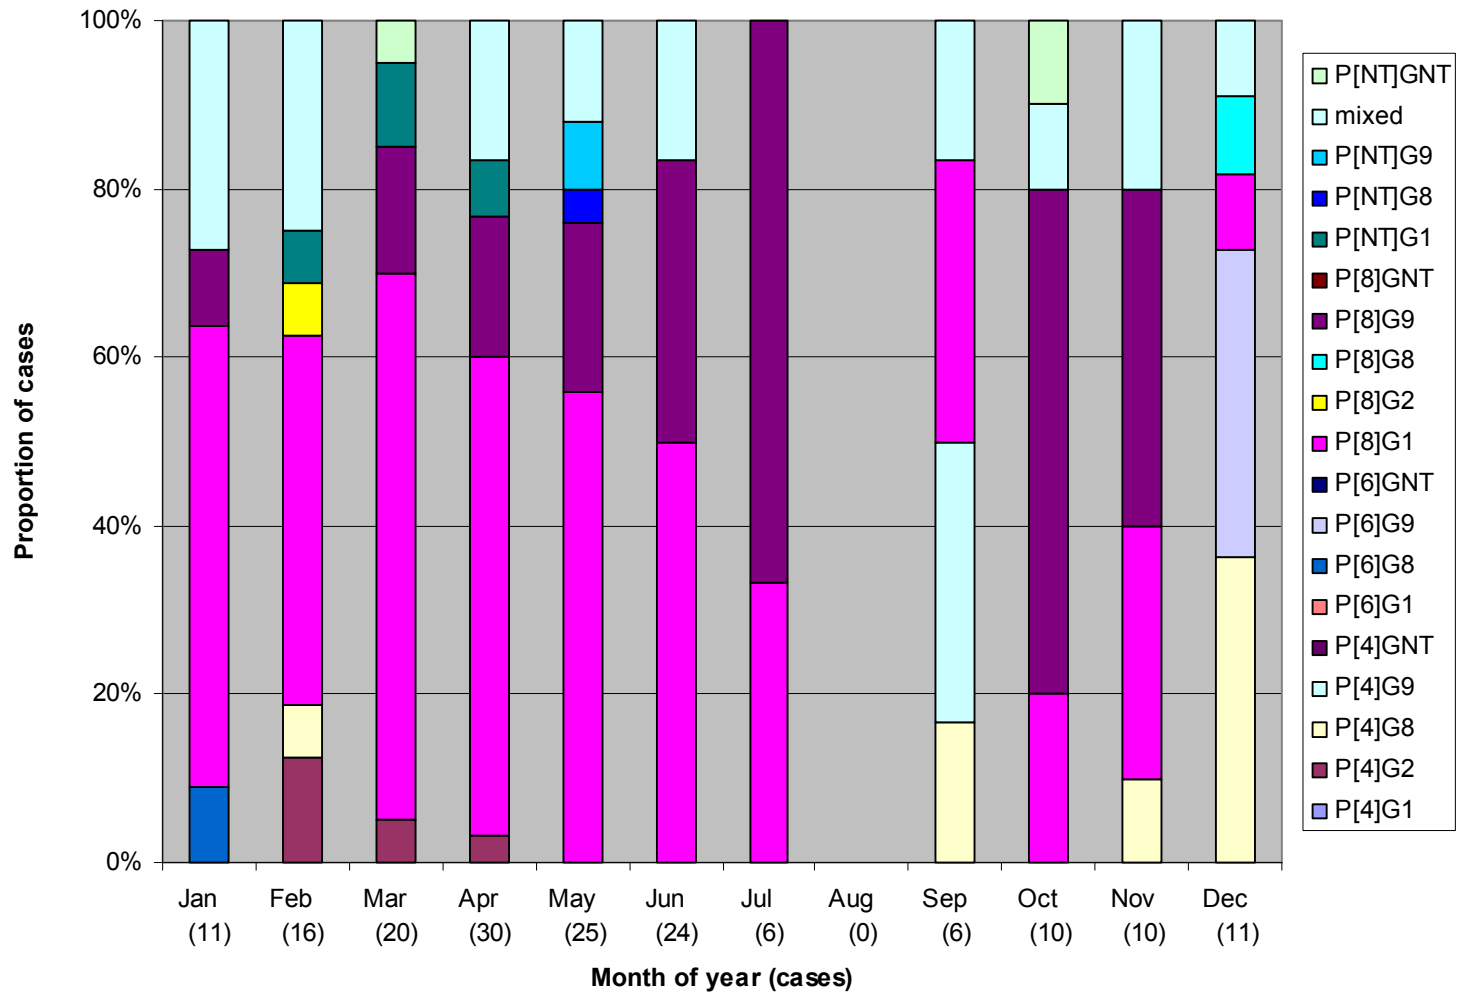

Fig. S1c 2004 Genotype distribution

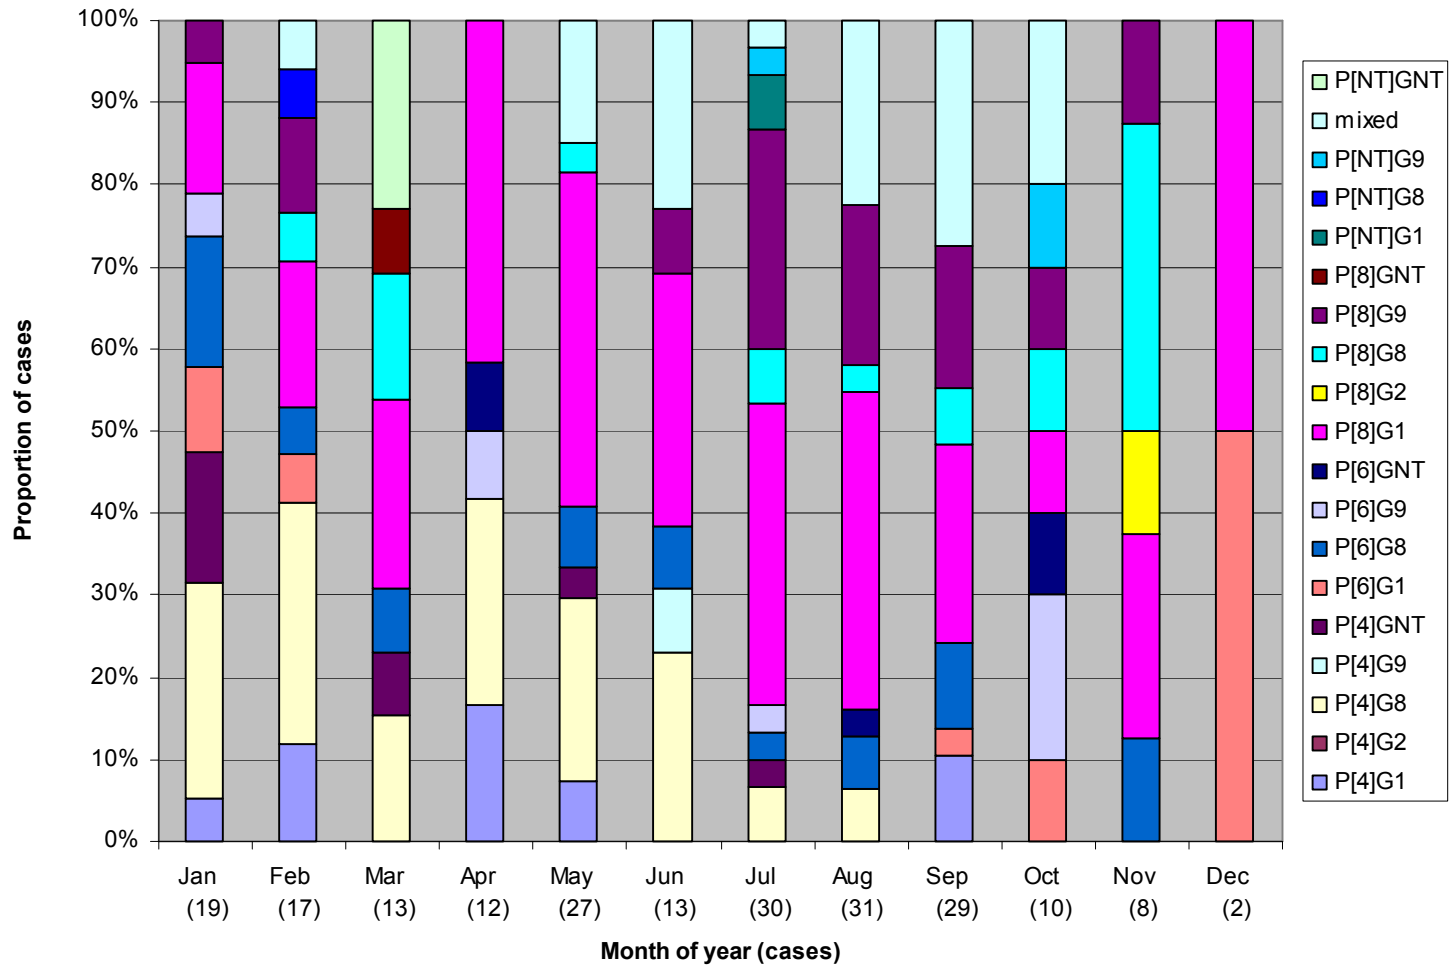

Supplement: NIHMS27209-supplement-1.pdf [file NIHMS27209-supplement-1.pdf]
